# Supplementary material for: Synthesis of mono-substituted 2,2′-bipyridinesElectronic supplementary information (ESI) available: experimental details and full characterization of new compounds. See http://www.rsc.org/suppdata/cc/b2/b203595b/
Source: Royal Society of Chemistry journal article supplement (doi:10.1039/b203595b), 2002-06-12
Supplement: b203595b.doc [file b203595b.doc]

# Supplementary data

**Synthesis of mono-substituted 2,2’-bipyridines**

Joseph G. Cordaro,a James K. McCusker*b and Robert G. Bergman*a

a University of California, Berkeley, CA 94720-1460

b Michigan State University, East Lansing, Michigan, 48824-1322

**Supporting information**

**Materials.** Unless otherwise noted, all solvent and reagents were purchased from commercial suppliers and used without further purification. 2-acetylpyridine was distilled and stored under nitrogen prior to use. Molecular sieves (4Å, Aldrich) were activated prior to use. Yttrium (III) hexafluoroacetylacetonate (Strem) was stored in a dessicator.

All NMR spectra were obtained using Bruker AM-400 or DRX-500 MHz spectrometers. Unless otherwise indicated, NMR spectra were recorded in CDCl3 solutions at 25 oC. 1H NMR spectra were recorded at 500 MHz and chemical shifts were referenced to the residual protiated solvent peak. 13C NMR spectra were recorded at 125 MHz and chemical shifts were referenced to the solvent. 19F NMR spectra were recorded at 377 MHz and chemical shifts are reported relative to external CFCl3. 1H NMR splitting patterns are reported as singlet (s), doublet (d), triplet (t), doublet of doublets (dd), doublet of triplets (dt), triplet of doublets (td) doublet of doublets of doublets (ddd), triplet of triplets (tt), quartet of doublets (qd), doublet of quartets (dq) and multiplet (m). All splitting is due to *J*HH unless otherwise mentioned. 19F and 13C NMR are proton decoupled. Infrared (IR) sample were prepared as solutions in CH2Cl2 and spectra were recorded using a Mattson Instruments Galaxy 3000 Fourier transform spectrometer. Mass spectrometric (MS) analyses were obtained at the University of California, Berkeley Mass Spectrometry Facility, on VT ProSpec, ZAB2-EQ, and 70-FE mass spectrometers. Unless otherwise noted, all FAB MS data were acquired from samples in a CH2Cl2/3-nitrobenzyl alcohol matrix. Elemental analyses were performed at the UC-Berkeley Microanalytical facility with a Perkin Elmer 2400 Series II CHNO/S Analyzer. Melting points are uncorrected.

All reactions were performed at room temperature unless otherwise stated. Yields given in Table 1 are usually an average of at least three reactions and do not always reflect the yields for the examples given below. Compounds **1b**1, **1f**2, **1g**2, **3b**3, **3g**4, **3h**5 and **3i**6 are known compounds.

**General procedure for aldol condensation reaction.** Compounds **1a** – **i** were synthesized via modification of literature produres.1,2,7 To a solution of the appropriate aldehyde (0.020 mol) and 1.0 M aqueous NaOH (15 mL)in 45 mL of methanol was added 2-acetylpyridine (0.021 mol). After 3 h of stirring, the solution was cooled to 0 ˚C and the yellow or red precipitate was collected on a coarse-pore glass frit, washed with water and then cold methanol and dried. The isolated product was usually recrystallized from methanol before use in the hetero-Diels Alder reaction. Deviations from this procedure are given below with the characterizations of new compounds.

**3-(4-Fluoro-phenyl)-1-pyridin-2-yl-propenone (1a).** The yellow precipitate was recrystallized twice from hot ethanol to give 2.32 g (51%). mp 91.0 – 92.0 ˚C. 1H NMR:  8.73 (ddd, *J* = 5, 2, 1 Hz, 1H), 8.23 (d, *J* = 16 Hz, 1H), 8.18 (dt, *J* = 7, 1 Hz, 1H), 7.88 (d, *J* = 16 Hz, 1H), 7.87 (dt, *J* = 7, 2 Hz, 1H), 7.70 (m, 2H), 7.49 (ddd, *J* = 7, 4, 1 Hz, 1H), 7.09 (m, 2H). 13C NMR:  188.9, 164.1 (d, *J*FC = 250 Hz), 153.8, 148.6, 143.6, 137.4, 131.4, 130.8 (d, *J*FC = 9 Hz), 127.0, 123.0, 120.5, 116.0 (d, *J*FC = 23 Hz). 19F NMR:  -109.5. IR: 3055, 1673, 1602, 1509, 1415, 1333, 1232, 1158, 1092, 1028, 993, 836, 794, 678, 619 cm-1. FAB HRMS: *m /z* calcd for C14H11FNO 228.0831 [M+H]+, found 228.0825.

**3-(4-Bromo-phenyl)-1-pyridin-2-yl-propenone (1b).**1 The reaction was preformed as described by Korall *et. al.* Yield: 3.79 g (66%). mp 100 -101 ˚C. 1H NMR:  8.71 (d, *J* = 5 Hz, 1H), 8.28 (d, *J* = 16 Hz, 1H), 8.16 (d, *J* = 8 Hz, 1H), 7.85 (m, 2H), 7.56 (d, *J* = 8 Hz, 2H), 7.52 (d, *J* = 8 Hz, 2H), 7.47 (dd, *J* = 7, 4 Hz, 1H).

**1-Pyridin-2-yl-3-(2,4,6-trimethoxy-phenyl)-propenone (1c).** Yield: 4.67 g (78%).mp 123.5 – 124.5 ˚C. 1H NMR:  8.70 (dd, *J* = 5, 1 Hz, 1H),8.41 (dd, *J* = 16, 16 Hz, 2H), 8.13 (d, *J* = 7 Hz, 1H), 7.81 (td, *J* = 8, 2 Hz, 1H), 7.41 (ddd, *J* = 7, 5, 1 Hz, 1H), 6.11 (s, 2H), 3.90 (s, 6H), 3.83 (s, 3H). 13C NMR:  191.0, 163.2, 161.9, 155.4, 148.7, 136.7, 136.3, 126.1, 122.7, 120.7, 106.8, 60.4, 55.8, 55.3. IR: 3052, 1669, 1572, 1512, 1465, 1422, 1336, 1294, 1252, 1173, 1031, 994, 833, 795 cm-1. Anal. Calcd for C17H17NO4: C, 68.22; H, 5.72; N, 4.68. Found C, 67.91; H, 5.56; N, 4.76.

**3-biphenyl-4-yl-1-pyridin-2-yl-propenone (1d).**  Yield: 4.91 g (86%). 1H NMR:  8.77 (ddd, *J* = 4, 1, 1 Hz, 1H), 8.37 (d, *J* = 16 Hz, 1H), 8.22 (d, *J* = 8 Hz, 1H), 7.99 (d, *J* = 16 Hz, 1H), 7.91 (td, *J* = 8, 2 Hz, 1H), 7.81 (d, *J* = 8 Hz, 2H), 7.64 (m, 4H), 7.52 (ddd, *J* = 8, 5, 1 Hz, 1H), 7.45 (t, *J* = 8 Hz, 2H), 7.37 (tt, *J* = 8, 1 Hz, 1H). 13C NMR:  188.8, 153.7, 148.4, 144.7, 143.4, 140.1, 137.6, 134.0, 129.4, 128.9, 127.8, 127.5, 127.0, 127.0, 123.2, 120.6. IR: 3052, 1671, 1600, 1582, 1557, 1489, 1410, 1332, 1270, 1220, 1185, 1030, 994, 838, 797 cm-1. FAB HRMS: *m /z* calcd for C20H16NO 286.1230 [M+H]+, found 286.1232.

**3-Anthracen-9-yl-1-pyridin-2-yl-propenone (1e).** The aldehyde (5.00 g, 24.2 mmol) was dissolved in toluene (30 mL) and added to a solution of 2-acetylpyridine (3.26 g, 26.9 mmol) in methanol (50 mL) and 1.0 M aqueous NaOH (12 mL). After stirring the solution overnight, most of the solvent was evaporated using a rotary evaporator. The product was then extracted with CH2Cl2 (3x45 mL), the organic layers dried (Na2SO4)and the solvent removed *in vacuo*. The resulting solid was crystallized from hot CH2Cl2/methanol (1:2) to give 5.02 g (67%) of orange needle-like crystals that were collected on a Büchner funnel, washed with cold methanol and dried. Addition of cold methanol to the mother liquor gave an additional 1.17 g (15%) of product as a precipitate. 1H NMR:  8.93 (d, *J* = 16 Hz, 1H), 8.70, (dd, *J* = 8, 2 Hz, 1H), 8.50 (s, 1H), 8.36 (d, *J* = 9 Hz, 2H), 8.29 (m, 2H), 7.92 (td, *J* = 8, 2 Hz, 1H), 7.50 (m, 5H). 13C NMR:  189.0, 154.0, 148.9, 141.9, 137.2, 131.3, 130.3, 130.1, 129.8, 128.8, 128.5, 127.0, 126.4, 125.5, 125.4, 123.2. IR: 3079, 3055, 1673, 1603, 1582, 1520, 1442, 1409, 1355, 1318, 1297, 1017, 994, 890, 849, 796, 618 cm-1. FAB HRMS: *m /z* calcd for C22H15NO 309.1146 [M+H]+, found 309.1154.

**3-(4-Nitro-phenyl)-1-pyridin-2-yl-propenone (1f).**2 Yield: 2.90 g (57%). 1H NMR:  8.76 (d, *J* = 4 Hz, 1H), 8.44 (d, *J* = 16, 1H), 8.27 (d, *J* = 8 Hz, 2H), 8.21 (d, *J* = 7Hz, 1H), 7.92 (m, 2H), 7.87 (d, *J* = 9 Hz, 2H), 7.54 (t, *J* = 6 Hz, 1H). Anal. Calcd for C14H10N2O3: C, 66.14; H, 3.96; N, 11.02. Found C, 66.10; H, 3.80; N, 11.13.

**3-(4-Methoxy-phenyl)-1-pyridin-2-yl-propenone (1g).**.2 Yield: 4.39 g (73%). 1H NMR:  8.73 (d, *J* = 4 Hz, 1H), 8.17 (m, 2H), 7.91 (d, *J* = 16 Hz, 1H), 7.85 (td, *J* = 8, 2 Hz, 1H), 7.68 (d, *J* = 8 Hz, 2H), 7.46 (dd, *J* = 8, 5 Hz, 1H), 6.92 (d, *J* = 8 Hz, 2H), 3.85 (s, 3H). FAB HRMS: *m /z* calcd for C15H14NO2 240.1022 [M+H]+, found 240.1025.

**3-[4-(3-Oxo-3-pyridin-2-yl-propenyl)-phenyl]-1-pyridin-2-yl-propenone (1h).** Yield: 4.42 g (65%). 1H NMR:  8.75 (ddd, *J* = 5, 1, 1 Hz, 2H), 8.34, (d, *J* = 16 Hz, 2H), 8.18 (dt, *J* = 8, 1 Hz, 2H), 7.92 (d, *J* = 16Hz, 2H), 7.87 (td, *J* = 8, 2 Hz, 2H), 7.76 (s, 4H), 7.49 (ddd, *J* = 8, 5, 1 Hz, 2H).  13C NMR:  189.3, 154.1, 148.9, 143.5, 137.1, 137.0, 129.2, 127.0, 122.9, 121.8. IR: 3051, 1698, 1672, 1604, 1583, 1438,1417, 1334, 1220, 1027, 995, 788 cm-1. FAB HRMS: *m/z* calcd for C22H17N2O2 341.1286 [M+H]+, found 341.1290.

**3-pyren-1-yl-1-pyridin-2-yl-propenone (1i).** A 250-mL Erlenmeyer flask was charged with the aldehyde (2.31 g, 0.01 mol), 20 mL of methanol and 30 mL of toluene giving a green solution. To the stirred solution, 2-acetyl pyridine (1.29 g, 0.012 mol) was added, followed by 1M aqueous NaOH (7.5 mL), which gave a red solution that turned yellow within minutes. After stirring for 24 h a yellow suspension had formed. The volume was reduced *in vacuo* by *ca.* 50% and the solid dissolved in CH2Cl2, washed once with H2O, dried (Na2SO4) and evaporated under reduced pressure. The solid was recrystallized from CH2Cl2/methanol to give 1.52 g (46%) of orange crystals in three crops of similar purity. 1H NMR:  9.12 (d, *J* = 16, 1H), 8.79 (d, *J* = 5, 1H), 8.62 (d, *J* = 10, 1H), 8.59 (d, *J* = 11, 1H), 8.57 (d, *J* = 4, 1H), 8.27 (d, *J* = 8, 1H), 8.20 (m, 4H), 8.11 (d, *J* = 9, 1H), 8.06 (d, *J* = 9, 1H), 8.02 (t, *J* = 8, 1H), 7.91 (td, *J* = 7, 1, 1H), 7.51 (ddd, *J* = 7, 4, 1, 1H). 13C NMR:  189.3, 154.4, 148.9, 141.2, 137.0, 133.0, 131.3, 130.7, 130.6, 128.93 128.7, 128.6, 127.4, 126.9, 126.2, 126.0, 125.9, 125.1, 125.0, 124.7, 123.0, 122.7. IR: 3045, 1667, 1591, 1578, 1538, 1370, 1320, 1243, 1218, 1027, 995, 848 cm-1. Anal. Calcd for C24H15NO: C, 86.46; H, 4.54; N, 4.20. Found C, 86.18; H, 4.68; N, 4.06.

**General procedure for hetero-Diels-Alder reaction.** 8 A 100-mL round bottomed flask was charged with a stir bar, the hetero-diene, yttrium (III) hexafluoroacetylacetonate (5 mol%) and 4 Å molecular sieves (*ca.* equal to mass of hetero-diene). THF (or CH2Cl2 for anthracenyl **1e**, 1,4-disubstituted phenylene **1h** and pyrenyl **1i**) was added such that the concentration of the hetero-diene would be *ca*. 0.2 M. Ethyl vinyl ether (10 equiv) was added to the flask, which was then sealed with a glass stopper. The reaction was usually monitored by removing an aliquot, evaporating the solvent *in vacuo* and taking up the residue in CDCl3. Analysis of this aliquot using 1H NMR spectroscopy determined the progress of the reaction. Alternatively, the reaction could be monitored via TLC (SiO2; diethyl ether/hexane 1:2). The reaction was usually complete after 24 h, at which time the solvent was filtered through Celite using a medium pore glass frit. The Celite was washed with diethyl ether (or CH2Cl2 for **2e**, **2h** and **2i**) and the organic solvent evaporated under reduced pressure to give a yellow or purple oil. Compounds **2a**, **2b**, **2d**, **2f**, and **2g** could only be isolated via chromatography on silica gel (diethyl ether/hexane 1:3 or 1:2 for compound **2f**) yielding a colorless oil ( >98% pure by GC, >99% pure by 1H NMR) which occasionally solidified. For **2c**, **2e**, **2h** and **2i** purification of the crude material was easily achieved by dissolving the crude material in a minimum amount of warm diethyl ether followed by addition of hexane to induce crystallization. Analytically pure material was isolated after cooling the solution in an ice bath, collecting the solid on a Büchner funnel and washing it with cold hexane. The filtrate could be concentrated to collect additional crops if the initial yield was low. Pyrenyl product **2i** was also isolated via chromatography (SiO2; diethyl ether/hexane 1:1), giving a light yellow solid in higher yield compared with that obtained by direct crystallization from the crude reaction product. For compounds isolated as oils, discoloration occurred within days, but the material looked clean by NMR and was successfully used in the final reaction. Total decomposition of oils was observed after several months at room temperature. Oils that crystallized or products isolated as solids appeared significantly more stable at room temperature, with no decomposition observed via NMR after several months.

**2-[6-Ethoxy-4-(4-fluoro-phenyl)-5,6-dihydro-4*H*-pyran2-yl]-pyridine (2a).**  Fluoro-phenyl substituted hetero-diene **1a** (1.00 g, 4.40 mmol) was used. Yield: 1.29 g (98%). mp 57.0 – 58.5 ˚C. 1H NMR:  8.55 (ddd, *J* = 5, 2, 1 Hz, 1H), 7.72 (td, *J* = 8, 2 Hz, 1H), 7.66 (d, *J* = 8 Hz, 1H), 7.26 (m, 2H), 7.20 (ddd, *J* = 5, 2, 1, 1H), 6.98 (m, 2H), 6.18 (dd, *J* = 3, 2 Hz, 1H), 5.27 (dd, *J* = 9, 2 Hz, 1H), 4.11 (dq, *J* = 9, 7 Hz, 1H), 3.83 (qd, *J* = 7, 3 Hz, 1H), 3.72 (dq, *J* = 9, 7 Hz, 1H), 2.37 (m, 1H), 1.98 (m, 1H), 1.31 (t, *J* = 7 Hz, 3H).  13C NMR:  161.6 (d, *J*FC = 244 Hz), 152.5, 149.0, 148.9, 139.8 (d, *J*FC = 3 Hz), 136.6, 128.9 (d, *J*FC = 8 Hz), 122.8, 118.7, 115.2 (d, *J*FC = 21 Hz), 104.0, 100.2, 64.6, 37.5, 37.0, 15.2. 19F NMR:  -117.2. IR: 3045, 2980, 2933, 2879, 1652, 1604, 1584, 1568, 1511, 1473, 1430, 1379, 1317, 1221, 1159, 1055, 938, 862, 838, 786 cm-1.FAB HRMS: *m /z* calcd for C18H19FNO2 300.1396 [M+H]+, found 300.1400. Anal. Calcd for C18H18FNO2: C, 72.22; H, 6.07; N, 4.68. Found C, 72.24; H, 6.25; N, 4.49.

**2-[4-(4-Bromo-phenyl)-6-ethoxy-5,6-dihydro-4*H*-pyran-2-yl]-pyridine (2b).** Bromo-phenyl substituted hetero-diene **1b** (3.38 g, 11.7 mmol) use used. Yield: 3.85 g (91%). 1H NMR:  8.51 (ddd, *J* = 5, 2, 1 Hz, 1H), 7.63 (m, 2H), 7.35 (dd, *J* = 7, 2 Hz, 2H), 7.13 (m, 3H), 6.16 (dd, *J* = 3, 1 Hz, 1H), 5.21 (dd, *J* = 9, 2 Hz, 1H), 4.05 (dq, *J* = 9, 7 Hz, 1H), 3.75 (m, 1H), 3.65 (dq, *J* = 9, 7 Hz, 1H), 2.30 (dd, *J* = 13, 7 Hz, 1H), 1.92 (m, 1H), 1.24 (t, *J* = 8 Hz, 1H).  13C NMR:  152.2, 148.9 148.8, 143.1, 136.4, 131.3, 129.1, 122.7, 120.0, 118.4, 103.2, 99.8, 64.4, 37.3, 36.6, 15.1. IR: 3050, 2979, 2934, 2874, 1652, 1584, 1568, 1487, 1473, 1431, 1405, 1379, 1316, 1272, 1158, 1071, 1038, 978, 937, 910, 861, 828 cm-1. FAB HRMS: *m /z* calcd for C18H19NO2 360.0594 [M+H]+, found 360.0599.

**2-[6-Ethoxy-4-(2,4,6-trimethoxy-phenyl)-5,6-dihydro-4*H*-pyran2-yl]-pyridine (2c).** Trimethoxy-phenyl substituted hetero-diene **1c** (3.00 g, 10.1 mmol) was used. Yield: 2.14 g (57%). 1H NMR:  8.47 (ddd, *J* = 5, 1, 1 Hz, 1H), 7.64 (td, *J* = 8, 1 Hz, 1H), 7.60 (d, *J* = 8 Hz, 1H), 7.10 (ddd, *J* = 7, 5, 2 Hz, 1H), 6.09 (s, 2H), 6.00 (s, 1H), 5.19 (dd, *J* = 10, 2 Hz, 1H), 4.41 (ddd, *J* = 12, 6, 3 Hz, 1H), 4.18 (dq, *J* = 7, 3 Hz, 1H), 3.78 (s, 3H), 3.76 (m, 1H), 3.70 (s, 6H), 2.44 (qd, *J* = 12, 2 Hz, 1H), 2.00 (dd, *J* = 12, 6 Hz, 1H), 1.34 (t, *J* = 7 Hz, 3H).  13C NMR:  159.7, 159.4, 153.3, 148.6, 147.1, 136.3, 122.0, 118.1, 111.6, 107.0, 101.7, 91.0, 64.8, 55.8, 55.3, 32.3, 28.3, 15.3. IR: 2978, 2942, 2839, 1651, 1586, 1469, 1378, 1320, 1224, 1204, 1150, 1121, 1036, 953, 819 cm-1. Anal. Calcd for C21H25NO5: C, 67.91; H, 6.78; N, 3.77. Found C, 67.77; H, 6.93; N, 3.83.

**2-(4-Biphenyl-4-yl-6-ethyoxy-5,6-dihydro-4*H*-pyran-2-yl)-pyridine (2d).** Biphenyl substituted hetero-diene **1d** (2.14 g, 7.5 mmol) was used. Yield: 2.33 g (87%). 1H NMR:  8.56 (ddd, *J* = 5, 2, 1 Hz, 1H), 7.70 (td, *J* = 7, 2 Hz, 1H), 7.68 (d, *J* = 8 Hz, 1H), 7.57 (dt, *J* = 7, 1 Hz, 2H), 7.53 (dt, *J* = 7, 2 Hz, 2H), 7.43 (td, *J* = 7, 1 Hz, 2H), 7.37 (d, *J* = 7 Hz, 2H), 7.33 (t, *J* = 7 Hz, 1H), 7.20 (ddd, *J* = 7, 5, 2 Hz, 1H) 6.23 (dd, *J* = 3, 1 Hz, 1H), 5.29 (dd, *J* = 8, 1 Hz, 1H), 4.13 (dq, *J* = 9, 7 Hz, 1H), 3.89 (m, 1H), 3.74 (dq, *J* = 9, 7 Hz, 1H), 2.41 (m, 1H), 2.07 (m, 1H), 1.32 (t, *J* = 7 Hz, 3H). 13C NMR:  152.6, 149.0, 149.0, 143.2, 141.0, 139.5, 136.7, 128.7, 127.9, 127.3, 127.1, 127.0, 122.8, 118.7, 104.3, 100.4, 64.6, 38.0, 36.9, 15.3. IR: 3209, 2932, 2879, 1652, 1584, 1567, 1486, 1473, 1379, 1316, 1268, 1156, 1055, 1068, 938, 862, 842 cm-1. FAB HRMS: *m /z* calcd for C22H24NO2 358.1800 [M+H]+, found 358.1807.

**2-(4-Anthracen-9-yl-6-ethoxy-5,6-dihydro-4*H*-pyran-2-yl)-pyridine (2e).** Anthracenyl substituted **1e** (5.02 g, 16.2 mmol) was used. Yield: 5.56 g (90%). mp 166 – 167 (dec.). 1H NMR:  8.61 (d, *J* = 9 Hz, 1H), 8.51 (d, *J* = 4 Hz, 1H), 8.39 (s, 1H), 8.30, (d, *J* = 9 Hz, 1H), 8.02 (d, *J* = 8 Hz, 1H), 7.97 (d, *J* = 8 Hz, 1H), 7.76 (dd, *J* = 4, 1 Hz, 2H), 7.51 (t, *J* = 8 Hz, 1H), 7.46 (t, *J* = 8 Hz, 1H), 7.42 (t, *J* = 8 Hz, 1H), 7.31 (t, *J* = 8 Hz, 1H), 7.20 (q, *J* = 4 Hz, 1H), 6.50 (s, *J* = 1 Hz, 1H), 5.53 (dd, *J* = 10, 2 Hz, 1H), 5.45 (dq, *J* = 6, 2 Hz, 1H), 4.30 (dq, *J* = 10, 7 Hz, 1H), 3.86 (qd, *J* = 10, 7 Hz, 1H), 2.75 (m, 1H), 2.46 (m, 1H), 1.39 (t, *J* = 8 Hz, 3H). 13C NMR:  152.6, 149.1, 148.0, 136.5, 134.0, 132.1, 131.5, 129.9, 129.8, 129.6, 129.2, 127.4, 126.0, 125.6, 125.1, 124.8, 124.5, 123.0, 122.6, 118.5, 107.6, 101.6, 65.1, 34.7, 33.4, 15.3.IR: 3057, 2976, 1650, 1585, 1567, 1472, 1430, 1379, 1314, 1156, 1053, 1034, 922, 887, 784 cm-1. Anal. Calcd for C26H23NO2: C, 81.86; H, 6.08; N, 3.67. Found C, 81.77; H, 5.95; N, 3.84.

**2-[6-Ethoxy-4-(4-nitro-phenyl)-5,6-dihydro-4*H*-pyran2-yl]-pyridine (2f).** Nitro-phenyl substituted hetero-diene **1f** (0.855 g, 3.36 mmol) was used. Yield: 1.06 g (97%). 1H NMR:  8.56 (d, *J* = 5 Hz, 1H), 8.12 (dd, *J* = 7, 2 Hz, 2H), 7.75 (t, *J* = 7 Hz, 1H), 7.67 (d, *J* = 8 Hz, 1H), 7.45 (d, *J* = 9 Hz, 2H), 7.24 (t, 7 Hz, 1H), 6.23 (d, *J* = 3 Hz, 1H), 5.29 (dd, *J* = 7, 2 Hz, 1H), 4.02 (dq, *J* = 9, 7 Hz, 1H), 3.90 (m, 1H), 3.65 (dq, *J* = 9, 7 Hz, 1H), 2.39 (dd, *J* = 13, 7 Hz, 1H), 2.02 (m, 1H), 1.21 (t, *J* = 7 Hz, 1H).  13C NMR:  152.1, 151.9, 149.1, 148.7, 146.6, 137.1, 128.6, 123.6, 123.2, 118.9, 102.5, 99.3, 64.6, 37.3, 36.0, 15.1. IR: 3060, 2975, 2934, 2881, 1654, 1598, 1584, 1515, 1473, 1437, 1378, 1347, 1317, 1298, 1156, 1110, 1055, 979, 938, 855, 779 cm-1. FAB HRMS: *m /z* calcd for C18H19N2O4 327.1342 [M+H]+, found 327.1331.

**2-[6-Ethoxy-4-(4-methoxy-phenyl)-5,6-dihydro-4*H*-pyran2-yl]-pyridine (2g).** Methoxy-phenyl substituted hetero-diene **1g** (0.966 g, 4.04 mmol) was used. Yield: 9.45 g (75%). mp 63.0 – 64.0 ˚C. 1H NMR:  8.53 (d, *J* = 5 Hz, 1H), 7.69 (td, *J* = 7, 2 Hz, 1H), 7.64 (d, *J* = 8 Hz, 1H), 7.20 (dt, *J* = 9, 2 Hz, 2H), 7.18 (m, 1H), 6.83 (dt, *J* = 8, 2 Hz, 2H), 6.16 (d, *J* = 1 Hz, 1H), 5.34 (dd, *J* = 9, 2 Hz, 1H), 4.12 (dq, *J* = 10, 7 Hz, 1H), 3.80 (m, 1H), 3.78 (s, 3H), 3.72 (dq, *J* = 10, 7 Hz, 1H), 2.34 (dd, *J* = 13, 7 Hz, 1H), 1.97 (m, 1H), 1.35 (t, *J* = 7 Hz, 3H).  13C NMR:  158.2, 152.6, 149.0, 148.6, 136.5, 136.1, 128.4, 122.7, 118.6, 113.8, 104.9, 100.4, 64.5, 55.2, 37.4, 37.0, 15.2.IR: 3050, 2980, 2935, 2838, 1651, 1611, 1584, 1568, 1512, 1472, 1430, 1379, 1316, 1251, 1176, 1157, 1110, 1037, 938, 835 cm-1. Anal. Calcd for C19H21NO3: C, 73.28; H, 6.60; N, 4.50. Found C, 73.44; H, 6.87; N, 4.42.

**C30H32N2O4 (2h).** Bis-(hetero-diene) **1h** (4.25 g, 12.5 mmol) was used. Yield: 4.81 g (79%). 1H NMR:  8.51 (ddd, *J* = 5, 2, 1 Hz, 2H), 7.76 (td, *J* = 7, 2 Hz, 2H), 7.63 (d, *J* = 8 Hz, 2H), 7.21 (s, 4H), 7.16 (td, *J* = 4, 2 Hz, 2H), 6.17 (dd, *J* = 3, 1 Hz, 2H), 5.23 (dd, *J* = 9, 1 Hz, 2H), 4.10 (dq, ­*J­* = 9, 7 Hz, 2H), 3.79 (m, 2H), 3.71 (dq, *J* = 9, 7 Hz, 2H), 2.33 (ddd, *J* = 9, 7, 1 Hz, 2H), 1.98 (m, 2H), 1.29 (t, *J* = 7 Hz, 6H). 13C NMR:  154.4, 148.8, 148.3, 142.2, 136.6, 127.5, 122.7, 118.6, 104.6, 100.4, 64.6, 38.0, 36.8, 15.2. IR: 2979, 2932, 2870, 1652, 1585, 1568, 1509, 1483, 1430, 1379, 1317, 1258, 1157, 1054, 1037, 938, 861, 840 cm-1. Anal. Calcd for C30H32N2O4: C, 74.36; H, 6.66; N, 5.78. Found C, 74.25; H, 6.51; N, 5.81.

**2-(4-pyrenyl-1-yl-6-ethoxy-5,6-dihydro-4*H*-pyran-2-yl)-pyridine (2i).** Pyrenyl substituted hetero-diene **2i** (1.67 g, 5.00 mmol) was used. Yield: 1.33 g (65%). mp 143 – 144 ˚C. 1H NMR:  8.60 (d, *J* = 5 Hz, 1H), 8.36 (d, *J* = 9 Hz, 1H), 8.15 (dd, *J* = 8, 1 Hz, 2H), 8.11 (m, 3H), 8.02 (s, 2H), 7.99 (t, *J* = 8 Hz, 1H), 7.75 (m, 2H), 7.22 (ddd, *J* = 9, 5, 3 Hz, 1H), 6.51 (d, *J* = 2 Hz, 1H), 5.47 (dd, *J* = 8, 2 Hz, 1H), 4.95 (m, 1H), 4.16, (dq, *J* = 10, 7 Hz, 1H), 3.76 (dq, *J* = 10, 7 Hz, 1H), 2.68 (dd, *J* = 13, 7 Hz, 1H), 2.27 (m, 1H), 1.32 (t, *J* = 7 Hz, 3H) 13C NMR:  152.7, 149.5, 149.1, 137.9, 136.5, 131.4, 130.7, 130.1, 128.1, 127.5, 127.5, 126.8, 125.7, 125.4, 125.1, 125.0, 125.0, 125.0, 124.7, 122.8, 122.5, 118.6, 104.6, 100.3, 64.7, 36.4, 34.2, 15.3. IR 3044, 2932, 2888, 1653, 1585, 1568, 1473, 1379, 1316, 1159, 1054, 1035, 940, 850, 754 cm-1. Anal. Calcd for C28H23NO2: C, 82.93; H, 5.73; N, 3.45. Found C, 82.87; H, 5.87; N, 3.35.

**Procedure for condensation reaction.** A 100-mL round bottomed flask was equipped with a stir bar, **2** (4.00 mmol),H2NOH•HCl (2.76 g, 40.0 mmol, 10 equiv), and acetonitrile (adjusted so the concentration of **2** was *ca.* 0.1 – 0.2 M). A reflux condenser was attached and the solvent heated to reflux with stirring, during which time a yellow precipitate formed. After approximately 6 h, the acetonitrile was removed under reduced pressure giving an orange solid. (For compound **3h**, the isolation and purification deviates from the other compounds. See the characterization for details.) A saturated aqueous solution of NaOH/NaCl (30 mL) and CH2Cl2 (30 mL) were added to the solid and the mixture stirred vigorously until all the solid dissolved. The organic layer was then extracted with CH2Cl2 (4x20 mL), dried (Na2SO4) and evaporated using a rotary evaporator. Compounds **3a**, **3b**, **3c** and **3g** were isolated and purified as follows: The crude yellow or brown product was extracted with warm diethyl ether (4x50 mL) and the solvent evaporated under reduced pressure to give a yellow-white solid. The solid was then recrystallized from a minimum amount of hot methanol to give white microcrystals. The mother liquor was reduced in volume to give additional crops if the yield was low. Alternatively, the crude product could be dissolved in diethyl ether and precipitated from solution as the HCl salt by the addition of excess HCl etherate. The resulting white solid collected on a glass frit and washed with diether ether and recrystallized from hot water/acetone (1:2). The free base was liberated by dissolving the hydrochloride salt in water, raising the pH to 13 with aqueous NaOH, extracted into CH2Cl2, followed by drying the organic solvent (Na2SO4) and finally, removing the solvent under reduced pressure to give a white solid. Isolating the product via protonation gave diminished yields but was sometimes easier than crystallizing the crude material extracted from the diethyl ether. The remaining compounds **3d**, **3e**, **3f**, **3h** and **3i** were isolated as described below. Yields are giving in Table 1 and are averages of at least 3 reactions

**4-(4-Fluoro-phenyl)-[2,2’]bipyridinyl (3a).** mp 88 ˚C. 1H NMR:  8.70 (m, 2H), 8.64 (d, *J* = 2 Hz, 1H), 8.47 (d, *J* = 8 Hz, 1H), 7.84 (td, *J* = 8, 2 Hz, 1H), 7.73 (m, 2H), 7.48 (dd, *J* = 6, 2 Hz, 1H), 7.33 (ddd, 7, 4, 1 Hz, 1H), 7.17 (m, 2H). 13C NMR:  163.5 (d, *J*FC = 249 Hz), 156.2, 155.5, 149.4, 149.0, 148.6, 137.2, 134.2 (d, *J*FC = 4 Hz), 129.0 (d, *J*FC = 9 Hz), 124.0, 121.5, 119.0, 116.1 (d, *J*FC = 22 Hz). IR: 3050, 1607, 1585, 1546, 1515, 1460, 1414, 1387, 1231, 1162, 1094, 1038, 992, 832, 795, 619, 558 cm-1. Anal. Calcd for C16H11FN2: C, 76.78; H, 4.44; N, 11.19. Found C, 76.88; H, 4.63; N, 11.09.

**4-(4-Bromo-phenyl)-[2,2’]bipyridinyl (3b).**3  This compound was reported while our work was in progress. mp 111 – 112 ˚C. 1H NMR:  8.72 (d, *J* = 5 Hz, 1H), 7.80 (d, *J* = 4 Hz, 1H), 8.65 (d, *J* = 1 Hz, 1H), 8.46 (d, *J* = 8 Hz, 1H), 7.85 (td, *J* = 8, 2 Hz, 1H), 7.62 (m, 4H), 7.50 (dd, *J* = 5, 1 Hz, 1H), 7.34 (ddd, *J* = 8, 5, 1 Hz, 1H). 13C NMR:  (ppm) 156.6, 155.8, 149.6, 149.0, 147.8, 137.0, 136.8, 132.1, 128.5, 123.8, 123.4, 121.1, 121.1, 118.5. IR: 3056, 1602, 1586, 1542, 1498, 1459, 1406, 1383, 1078, 1010, 825, 794 cm-1. The independent report gave NMR data in acetone-d6; it appears to be consistent with ours. Anal. Calcd for C16H11N2Br: C, 61.76; H, 3.56; N, 9.00. Found C, 61.55; H, 3.37; N, 9.05.

**4-(2,4,6-trimethoxy-phenyl)-[2,2’]bipyridinyl (3c).** mp 112 – 113 ˚C. 1H NMR:  8.64 (m, 2H), 8.40 (d, *J* = 8 Hz, 1H), 8.35 (d, *J* = 1Hz, 1H), 7.78 (td, *J* = 7, 2 Hz, 1H), 7.29 (dd, *J* = 5, 2 Hz, 2H), 7.25 (td, *J* = 6, 1 Hz, 1H), 6.20 (s, 2H), 3.84 (s, 3H), 3.70 (s, 6H). 13C NMR:  161.4, 158.2, 156.5, 155.2, 149.0, 148.3, 144.15, 136.7, 126.6, 124.0, 123.3, 121.1, 109.8, 90.7, 55.8, 55.3. IR: 3060, 2967, 2840, 1609, 1586, 1504, 1458, 1417, 1389, 1336, 1270, 1224, 1205, 1158, 1131, 1071, 1038, 992, 950, 851, 796 cm-1. Anal. Calcd for C19H18N2O3: C, 70.79; H, 5.64; N, 8.69. Found C, 70.77; H, 5.85; N, 8.53.

**4-(4-Biphenyl)-[2,2’]bipyridinyl (3d).** mp 169 ˚C (dec.). The crude product was dissolved in hot CH2Cl2/methanol and then cooled in an ice bath. The resulting white precipitate was collected, washed with cold methanol and dried. The mother liquor was reduced in volume giving an additional crop. 1H NMR:  8.73 (m, 3H), 8.76 (d, *J* = 8 Hz, 1H), 7.84 (m, 3H), 7.72 (d, *J* = 9 Hz, 2H), 7.65 (d, 7 Hz, 2H), 7.58 (dd, *J* = 5, 2 Hz, 1H), 7.46 (t, *J* = 8 Hz, 2H), 7.38 (t, *J* = 7 Hz, 1H), 7.33 (ddd, *J* = 7, 5, 1 Hz, 1H). 13C NMR:  156.7, 156.1, 149.7, 149.2, 148.7, 141.9, 140.3, 137.0, 136.9, 128.9, 127.7, 127.5, 127.1, 123.8, 121.4, 121.3, 118.8. IR: 3052, 3035, 1600, 1586, 1490, 1459, 1386, 835, 618, 557 cm-1. Anal. Calcd for C22H16N2: C, 85.68; H, 5.24; N, 9.08. Found C, 85.66; H, 5.48; N, 9.11.

**4-Anthracen-9-yl-[2,2’]bipyridinyl (3e).** mp 204 – 205 ˚C. The crude product was dissolved in boiling toluene/CH2Cl2 (2:1) and filtered. Upon cooling in an ice bath a white precipitate formed. The solid was collected, washed with cold toluene then hexane and dried. The mother liquor was reduced in volume so a second crop could be isolated. 1H NMR:  8.92 (d, *J* = 5 Hz, 1H), 8.62 (d, *J* = 5 Hz, 1H), 8.55 (m, 3H), 8.05 (d, *J* = 9 Hz, 2H), 7.87 (td, *J* = 8, 2 Hz, 1H), 7.64 (d, *J* = 9 Hz, 2H), 7.45 (m, 3H), 7.37 (m, 2H), 7.31 (m, 1H). 13C NMR:  156.1, 155.6, 149.2, 149.1, 148.89, 137.0, 133.7, 131.1, 129.4, 128.5, 127.5, 126.5, 126.0, 126.0, 125.2, 124.0, 123.9, 121.4. IR: 3052, 1600, 1586, 1461, 1414, 1389, 890, 847, 793. IR 3052, 1560, 1586, 1461, 1414, 1389, 847 cm-1. Anal. Calcd for C24H16N2: C, 86.72; H, 4.85; N, 8.43. Found C, 86.42; H, 4.50; N, 8.47.

**4-(4-Nitro-phenyl)-[2,2’]bipyridinyl (3f).** mp 165 ˚C. The crude product was dissolved in warm toluene/diethyl ether (1:1) and filtered. HCl etherate (ca. 15 mL, 1M) was added to the solution giving a white precipitate. The precipitate was collected and washed with ether. The HCl salt of **3f** was then recrystallized twice from hot H2O/acetone (3:2) to give a light yellow solid. The solid was converted to the free base by dissolving it in H2O, followed by adding a saturated solution of aqueous NaOH/NaCl. The resulting white precipitate was cooled in an ice bath then collected, washed with water and dried. Analytically pure material was obtained via recrystallization from CH2Cl2/methanol (2:1). 1H NMR:  8.74 (d, , *J* = 5 Hz 1H), 8.67 (d, *J* = 4 Hz, 1H), 8.65 (s, 1H), 8.43 (d, *J* = 8 Hz, 1H), 8.29 (d, *J* = 9 Hz, 2H), 7.84 (d, *J* = 9 Hz, 2H), 7.82 (m, 1H), 7.49 (dd, *J* = 5, 1 Hz, 1H), 7.32 (dd, *J* = 7, 5 Hz, 1H). 13C NMR:  157.0, 155.4, 149.9, 149.1, 148.1, 146.7, 144.6, 137.0, 128.0, 124.1, 124.1, 121.5, 121.2, 119.0. IR: 2977, 1585, 1550, 1523, 1459, 1414, 1386, 1261, 1110, 992, 841 cm-1. Anal. Calcd for C16H11N3O2: C, 69.30; H, 4.01; N, 15.15**.** Found C, 69.31; H, 4.26; N, 15.02.

**4-(4-Methoxy-phenyl)-[2,2’]bipyridinyl (3g).**4 mp 129 – 130 ˚C (lit.4 130 – 131.5 ˚C). 1H NMR:  8.69 (d, *J* = 4 Hz, 1H, lit. 8.70), 8.66 (d, *J* = 5 Hz, lit. 8.67), 8.63 (d, *J* = 1 Hz, 1H, lit. 8.64), 7.81 (td, *J* = 8, 2 Hz, 1H, lit. 7.82), 7.71 (d, *J* = 9 Hz, 2H, lit. 7.72), 7.48 (dd, *J* = 5, 2 Hz, 1H, lit. 7.48), 7.31 (ddd, *J* = 8, 5, 1 Hz, 1H, lit. 7.31), 6.99 (d, *J* = 9 Hz, 2H, lit. 7.00), 3.84 (s, 3H).

**1,4-bis-([2,2’]bipyridin-4-yl)-benzene (3h).**5 This compound required additional steps to isolate. After refluxing the acetonitrile solution for 6 h, the solvent was evaporated under reduced pressure, giving an orange solid. The solid was dissolved in 1M HCl and filtered through a medium pore glass frit. The orange filtrate was brought to pH 6 giving a white precipitate that was collected on a medium pore glass frit, washed with water then dissolved in CHCl3. The organic solution was washed once with water, dried (Na2SO4) and evaporated under reduced pressure. The resulting solid was dissolved in hot CH2Cl2/methanol (2:1), filtered and cooled in an ice bath giving a white precipitate. The solid was collect on a Büchner funnel, washed with cold methanol and dried. It was necessary to collect multiple crops from the mother liquor to get sufficient yields. The resulting white product appeared clean by 1H NMR ( > 95%), but contained insoluble material. The solid decomposed near 212 ˚C, well before reaching the published melting point of 263 ˚C.5 1H NMR:  (ppm) 8.75 (d, *J* = 5 Hz, 2H, lit. 8.78, m, 4H), 8.72 (s, 4H, lit. 8.74, d, 2H), 8.46 (d, *J* = 8 Hz, 2H, lit. 8.53, d, 2H), 7.90 (s, 4H, lit. 7.94, s, 4H), 7.85 (td, *J* = 7, 2 Hz, 2H, lit. 7.89, td, 2H), 7.57 (dd, *J* = 4, 1 Hz, 2H, lit. 7.64, dd, 2H), 7.35 (dd, *J* = 7, 5 Hz, 2H, lit. 7.39, dd, 2H). EI LRMS: 386 M+, 308 [M-py+]; HRMS: *m /z* calcd for C26H18N4 386.1526 M+, found 386.1531.

**4-Pyren-1-yl-[2,2’]bipyridinyl (3i).**6 The crude product was dissolved in warm CH2Cl2/methanol (1:1), mixed with Norite and filtered. Upon cooling in an ice bath, light yellow crystals formed and were collected and washed with cold methanol. A second crop of crystals was isolated from the filtrate by concentrating the mother liquors. mp 163 – 164 ˚C (lit.6 169 ˚C) 1H NMR:  8.85 (d, *J* = 4 Hz, 1H, lit. 8.86), 8.73 (s, 1H, lit. 8.73), 8.67 (d, *J* = 4 Hz, 1H, lit. 8.69 ) 8.53 (d, *J* = 8 Hz, 1H, lit. 8.54), 8.21 (t, *J* = 7 Hz, 2H, lit. 8.23), 8.16 (d, *J* = 9 Hz, 2H, lit. 8.17 ), 8.10 (d, *J* = 9 Hz, 1H, lit. 8.11), 8.07 (d, *J* = 9 Hz, 1H, lit. 8.11), 8.01 (m, 3H, lit. 8.00-8.024), 7.86 (t, *J* = 7 Hz, 1H, lit. 7.87), 7.57 (d, *J* = 4 Hz, 1H, lit. 7.59), 7.31 (dd, *J* = 13, 5 Hz, 1H, lit. 7.34).

**References:**

1 P. Korall, A. Borje, P. O. Norrby and B. Åkermark, *Acta Chem. Scand.*, 1997, ***51***, 760.

2 S. Otto, F. Bertoncin and J. Engberts, *J. Am. Chem. Soc.*, 1996, ***118***, 7702.

3 M. Montalti, S. Wadhwa, W. Y. Kim, R. A. Kipp and R. H. Schmehl, *Inorg. Chem.*, 2000, ***39***, 76.

4 M. A. Hayes, C. Meckel, E. Schatz and M. D. Ward, *J. Chem. Soc., Dalton Trans.*, 1992, 703.

5 A. I. Baba, W. Wang, W. Y. Kim, L. Strong and R. H. Schmehl, *Syn. Commun.*, 1994, ***24***, 1029.

6 A. L. Rodriguez, G. Peron, C. Duprat, M. Vallier, E. Fouquet and F. Fages, *Tetrahedron Lett.*, 1998, ***39***, 1179.

7 C. Engler and A. Engler, Chem. Ber., 1902, 35, 4064.

8 M. A. Ciufolini and N. E. Byrne, Chem. Commun., 1988, 1230.
